# Supplementary material for: Highly Sensitive Temperature Sensors Resulting from the Luminescent Behavior of Sm3+-Doped Ba2MgMoO6 High-Symmetry Double-Perovskite Molybdate Phosphors
Source: MDPI journal article supplement (doi:10.3390/ma17081897), 2024-04-19
Supplement: s1 [file s1]

## Supplementary

### Highly sensitive temperature sensors resulting from the luminescent behavior of $\text{Sm}^{3+}$ -doped $\text{Ba}_2\text{MgMoO}_6$ high symmetry double-perovskite molybdate phosphors

N. Miniajluk-Gaweł<sup>a\*</sup>, B. Bondzior<sup>a</sup>, M. Ptak<sup>a</sup>, P. J. Dereń<sup>a\*</sup>

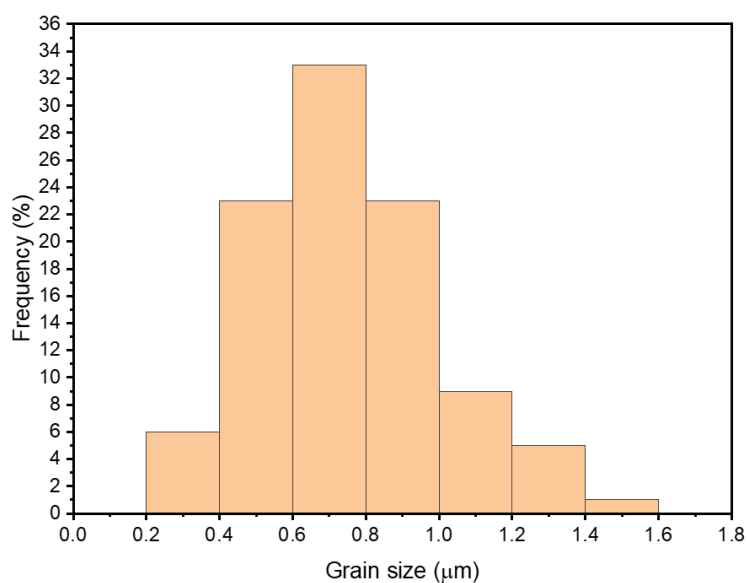

**Figure S1.** Histogram of the average crystal size.

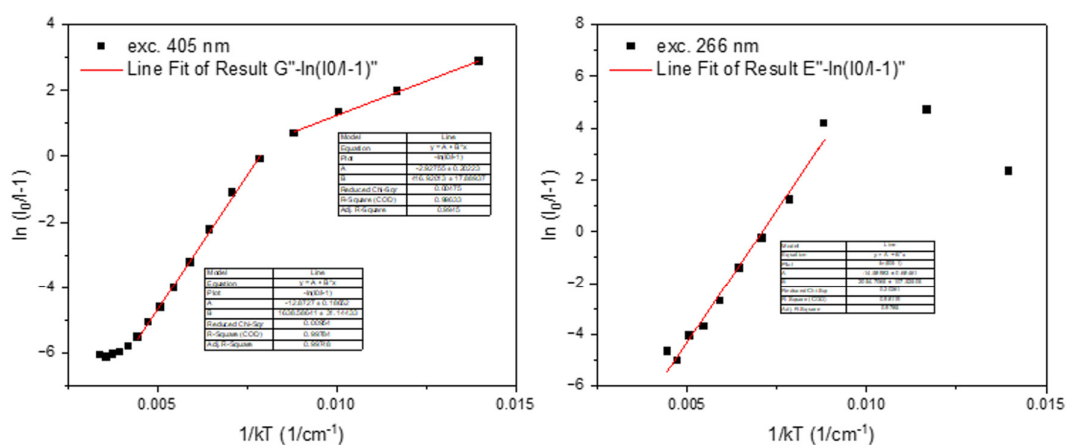

**Figure S2.** Fitting of an Arrhenius equation to temperature-dependent emission intensity of  $\text{BMM}:\text{Sm}^{3+}$  excited at 405 nm (left) and 266 nm (right).
